# Supplementary material for: Structure of Full-Length SMC and Rearrangements Required for Chromosome Organization
Source: PubMed Central journal article supplement (PMC5526789; doi:10.1016/j.molcel.2017.06.010), 2017-07-20
Supplement: mmc1.pdf [file mmc1.pdf]

**Molecular Cell, Volume 67**

**Supplemental Information**

**Structure of Full-Length SMC  
and Rearrangements Required  
for Chromosome Organization**

**Marie-Laure Diebold-Durand, Hansol Lee, Laura B. Ruiz Avila, Haemin Noh, Ho-Chul Shin, Haeri Im, Florian P. Bock, Frank Bürmann, Alexandre Durand, Alrun Basfeld, Sihyun Ham, Jérôme Basquin, Byung-Ha Oh, and Stephan Gruber**

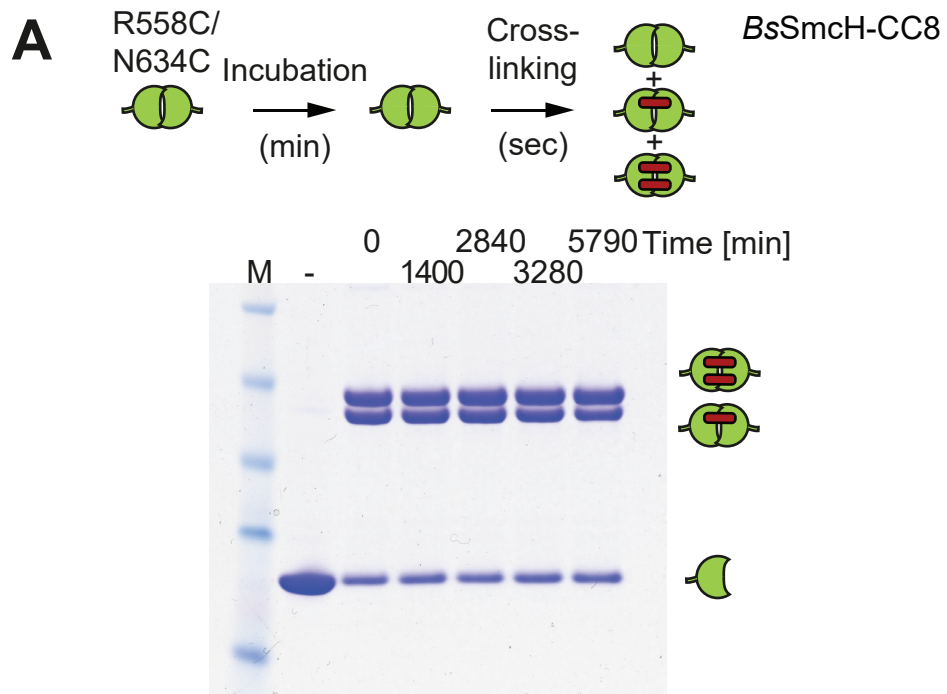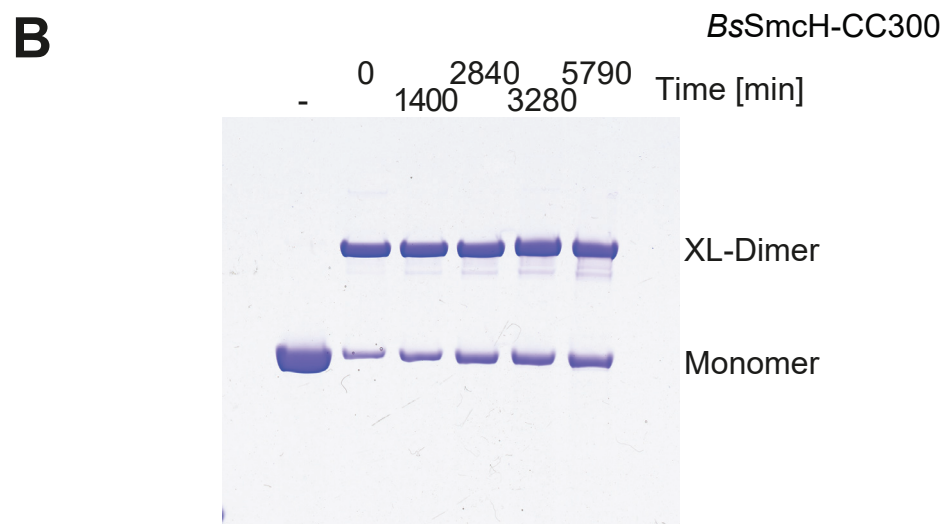

Figure S1

**Figure S1.** Robust long-term stability of cysteine cross-linking. Related to Figure 1.

(A) Purified preparations of *BsSmcH-CC8(R558C, N634C)* were incubated at 37°C. At the indicated time points samples were cross-linked by BMOE. Monomer and cross-linked dimer species were separated by SDS-PAGE and detected by Coomassie staining. '-' denotes samples treated with DMSO instead of BMOE.

(B) Same as in (A) with *BsSmcH-CC300(R558C, N634C)*. Please note that robust cysteine cross-linking is observed after extended periods of incubation at 37°C. The lack of cross-linking observed in Figure 1C is thus due to slow subunit turn-over.

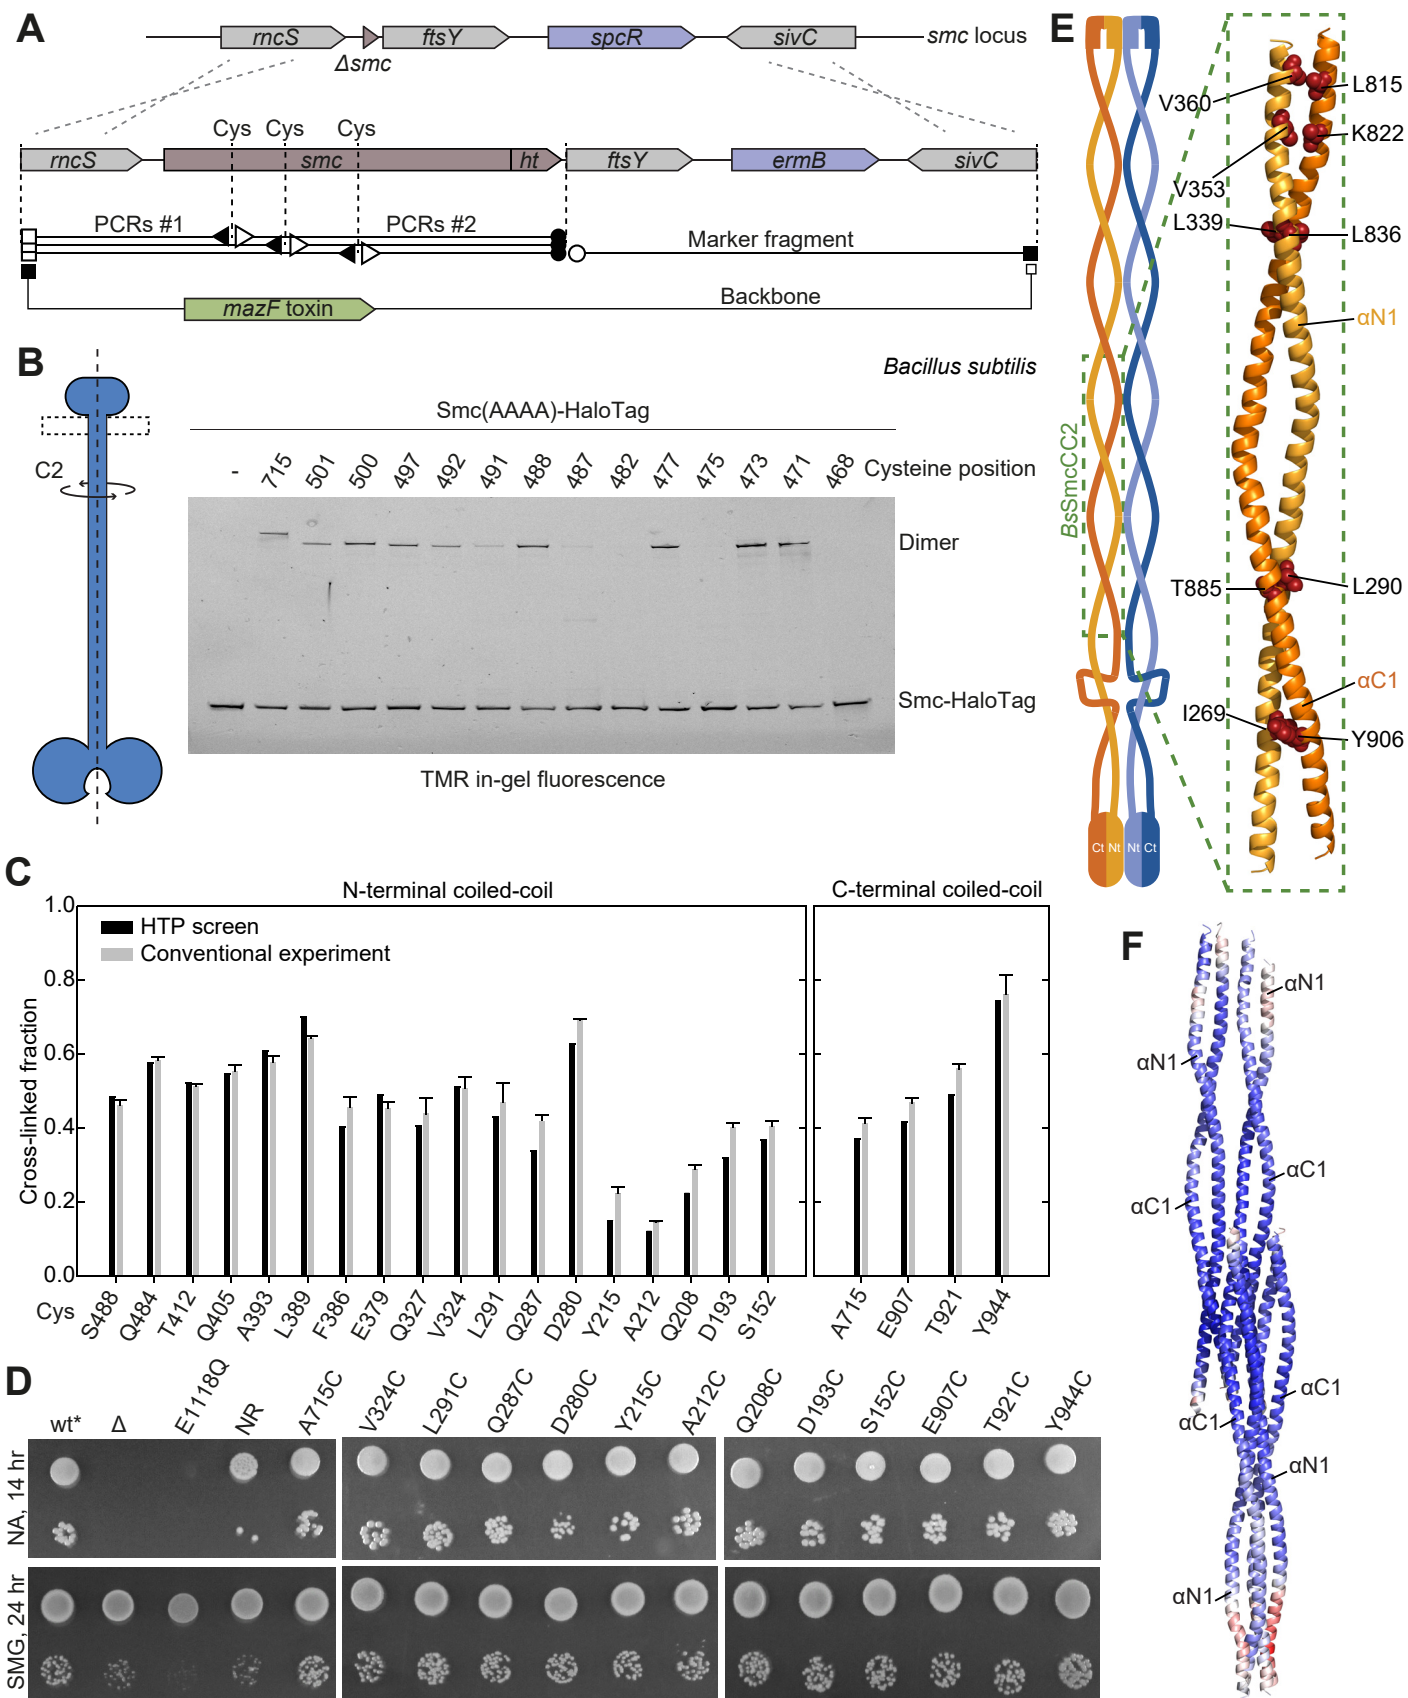

Figure S2

**Figure S2.** Mapping of the Smc rod by cysteine cross-linking and structural analysis.

Related to Figure 2.

(A) Gene targeting strategy.

(B) Exemplary output of cysteine mapping screen for Smc residues located close to the Smc hinge domain in the N-terminal  $\alpha$ -helix. Smc-HaloTag species labelled by HaloTag-TMR are separated by SDS-PAGE and detected by in-gel fluorescence scanning. Smc(A715C) serves as a positive control (Soh et al., 2015). Please note that the migration of the cross-linked dimer fraction depends on the position of the cysteine residue. All original gel images are available on Mendeley Data.

(C) Selected Smc(Cys) mutants were generated by conventional allelic replacement without selection for Smc function during growth. Cysteine cross-linking efficiency was compared to corresponding results from the high-throughput screen ('HTP'). Mean and standard deviation from three technical replicates are shown for the conventional experiment.

(D) Growth of selected Smc(Cys) mutants on nutrient rich ('Oxoid nutrient agar', 'ONA') and nutrient poor medium ('SMG'). Serial dilutions of overnight-cultures were spotted. Strain denoted as 'NR' is not related to this study.

(E) Organization of the Smc coiled coil in *BsSmcCC2* in cartoon representation. N- and the C-terminal helices (residues 246-379 and 793-929, respectively) are colored in bright and dark orange colors, respectively. Previously identified heptad residues (positions 'a' and 'd') are displayed as spheres in red colors (Minnen et al., 2016; Waldman et al., 2015).

(F) Organization of the two dimers of BsSmcCC2 in the crystal unit. Molecules are colored according to the local B-factor, lowest in blue, highest in red. The two dimers are organized top-to-tail in the asymmetric unit, the head proximal region of the coiled coils are juxtaposed. Probably due to crystal packing, the electron density of the head-proximal region is better defined, the main- and side-chains being clearly visible in the density.



**Figure S3.** The Smc joint domain in *Bs* Smc and *Py* Smc. Related to Figure 3.

(A) Structure of part of the Smc3 joint domain present in PDB: 4UX3 (left panel). Sequence alignment of C-terminal SMC joint residues indicating highly-conserved residue including an invariable asparagine.

(B) Two monomers of *BsSmcCC1* (in side view and top view) were arranged side-by-side in a manner that minimizes the overall distances between cross-linkable cysteine side chains in the Smc joint domain and the adjacent coiled coil. Rendering, color coding and distance/cross-linking efficiency graph as in Figure 2B.

(C) Superimposition of *PySmcHd-CC80* (in orange colors) with *BsSmcCC1* (in purple colors) and the Smc moiety of *BsSmcHd-CC30:ATPγS–ScpA<sup>C</sup>* (in green colors). Two side views are displayed in the left and right panels. Overall, the structures display excellent overlap.

(D) *Bs* Smc residues corresponding to residues in *PySmcHd-CC80*. N-terminal Smc sequences (left panel) and C-terminal Smc sequences (right panel) are displayed. Numbers above and below the sequence lines denote *Bs* and *Py* Smc positions, respectively. Selected residues are highlighted by red boxes.



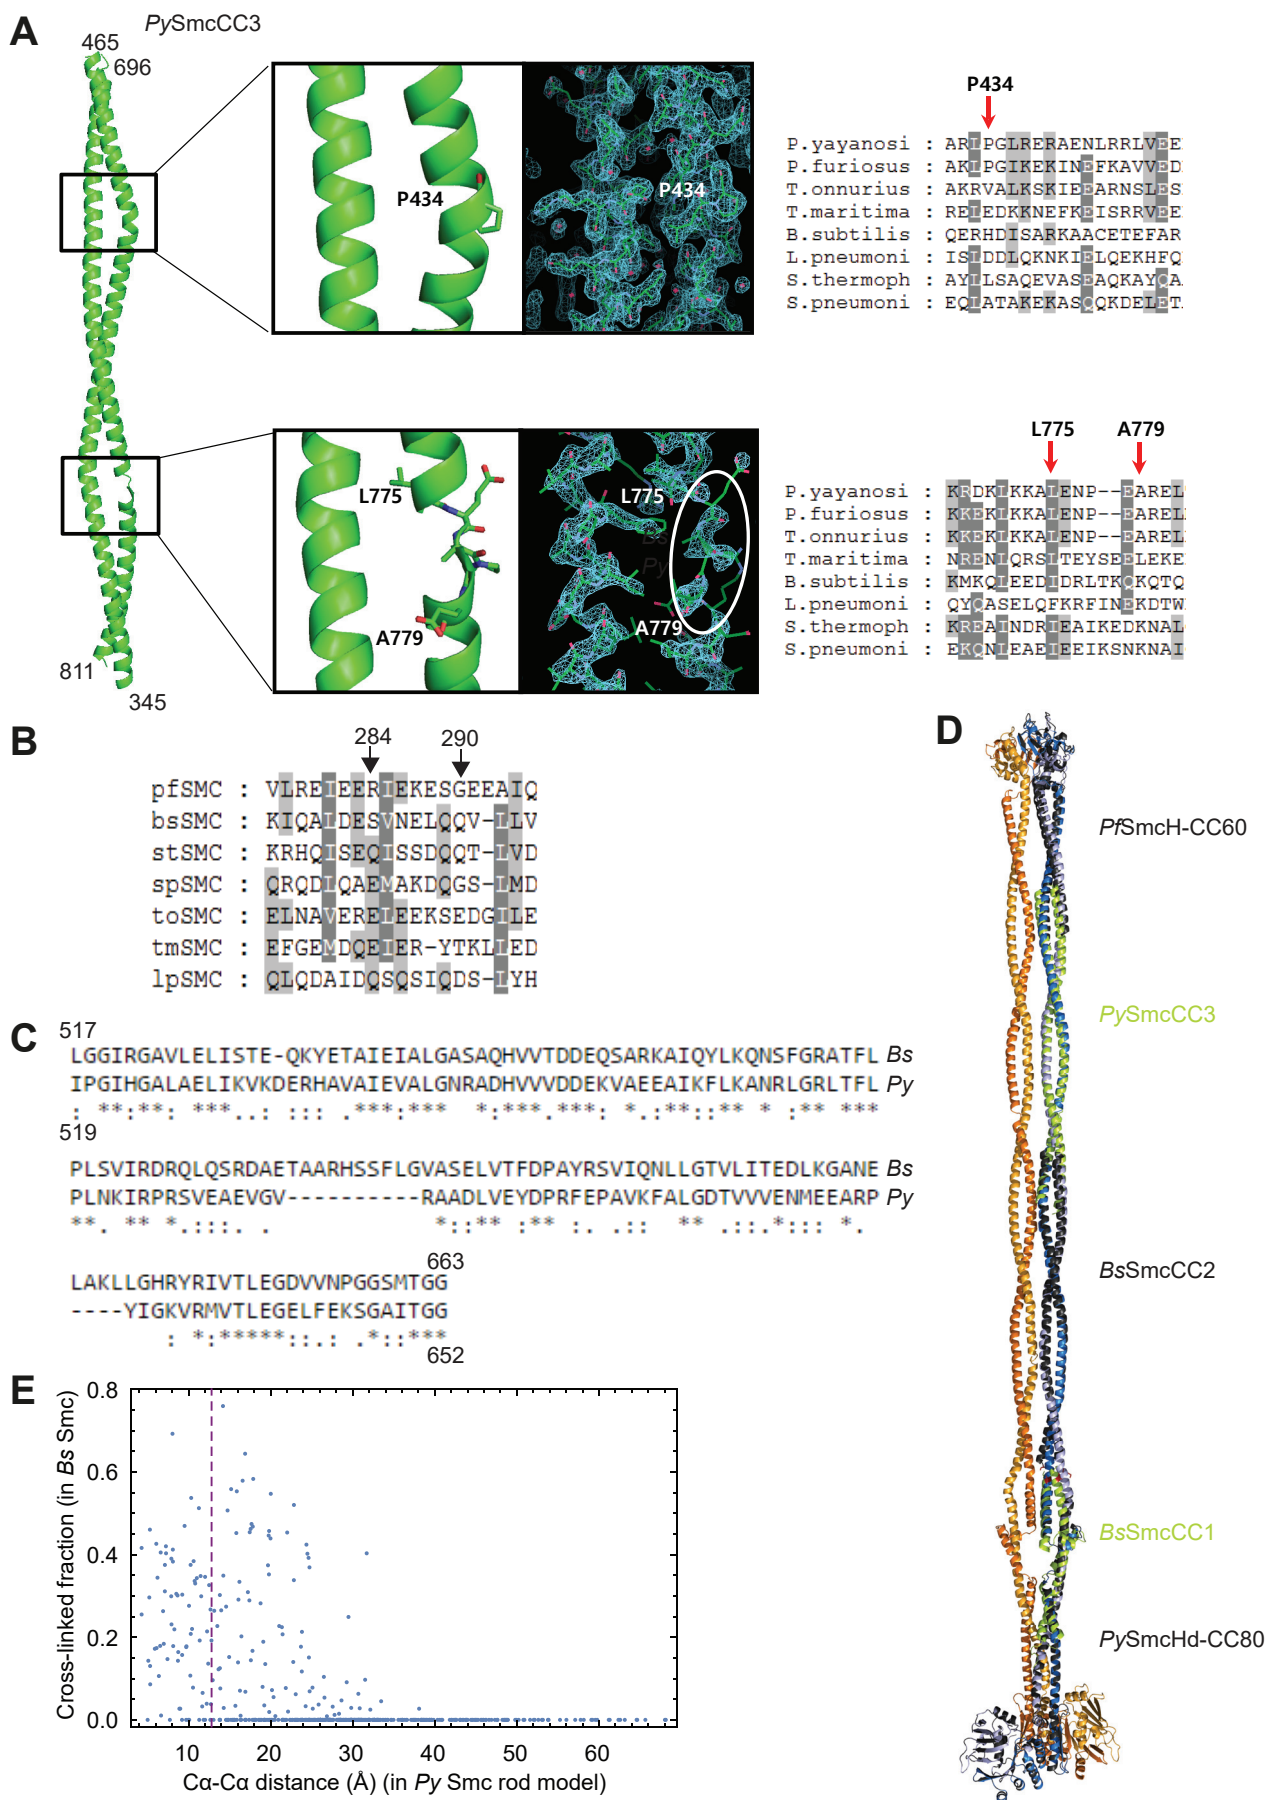

Figure S4

**Figure S4.** Reconstruction and evaluation of the Smc rod structure. Related to Figure 4.

(A) Structural overview (left panel) of *PySmcCC3*. Regions displaying deviations from the canonical coiled coil architecture are shown in boxed insets (middle panels). Residues P434 and G435 result in the kinking of the N-terminal  $\alpha$ -helix (top panel), while two residues lacking in the C-terminal helix cause a deformation of the  $\alpha$ -helical pattern. Sequence alignments are shown for these selected regions (right panels).

(B) A single amino-acid insertion in the N-terminal *Pf* Smc coiled coil. Sequences were aligned taking into account the predicted coiled coil register.

(C) *Bs* Smc hinge domain residues corresponding to *Py* Smc residues. Numbers above and below the sequence lines denote *Bs* and *Py* Smc residues, respectively.

(D) Superimposition of the Smc rod model with individual crystal structures. Five structures were superimposed with the blue monomer of the Smc rod model shown in Figure 4B. The top and bottom ends of crystal structures were slightly adjusted manually to connect them into a straight molecule.

(E) Plot of C $\alpha$ -C $\alpha$  distance against cross-linking efficiency for the *Py* Smc rod model shown in Figure 4C. The data is available in Table S5.

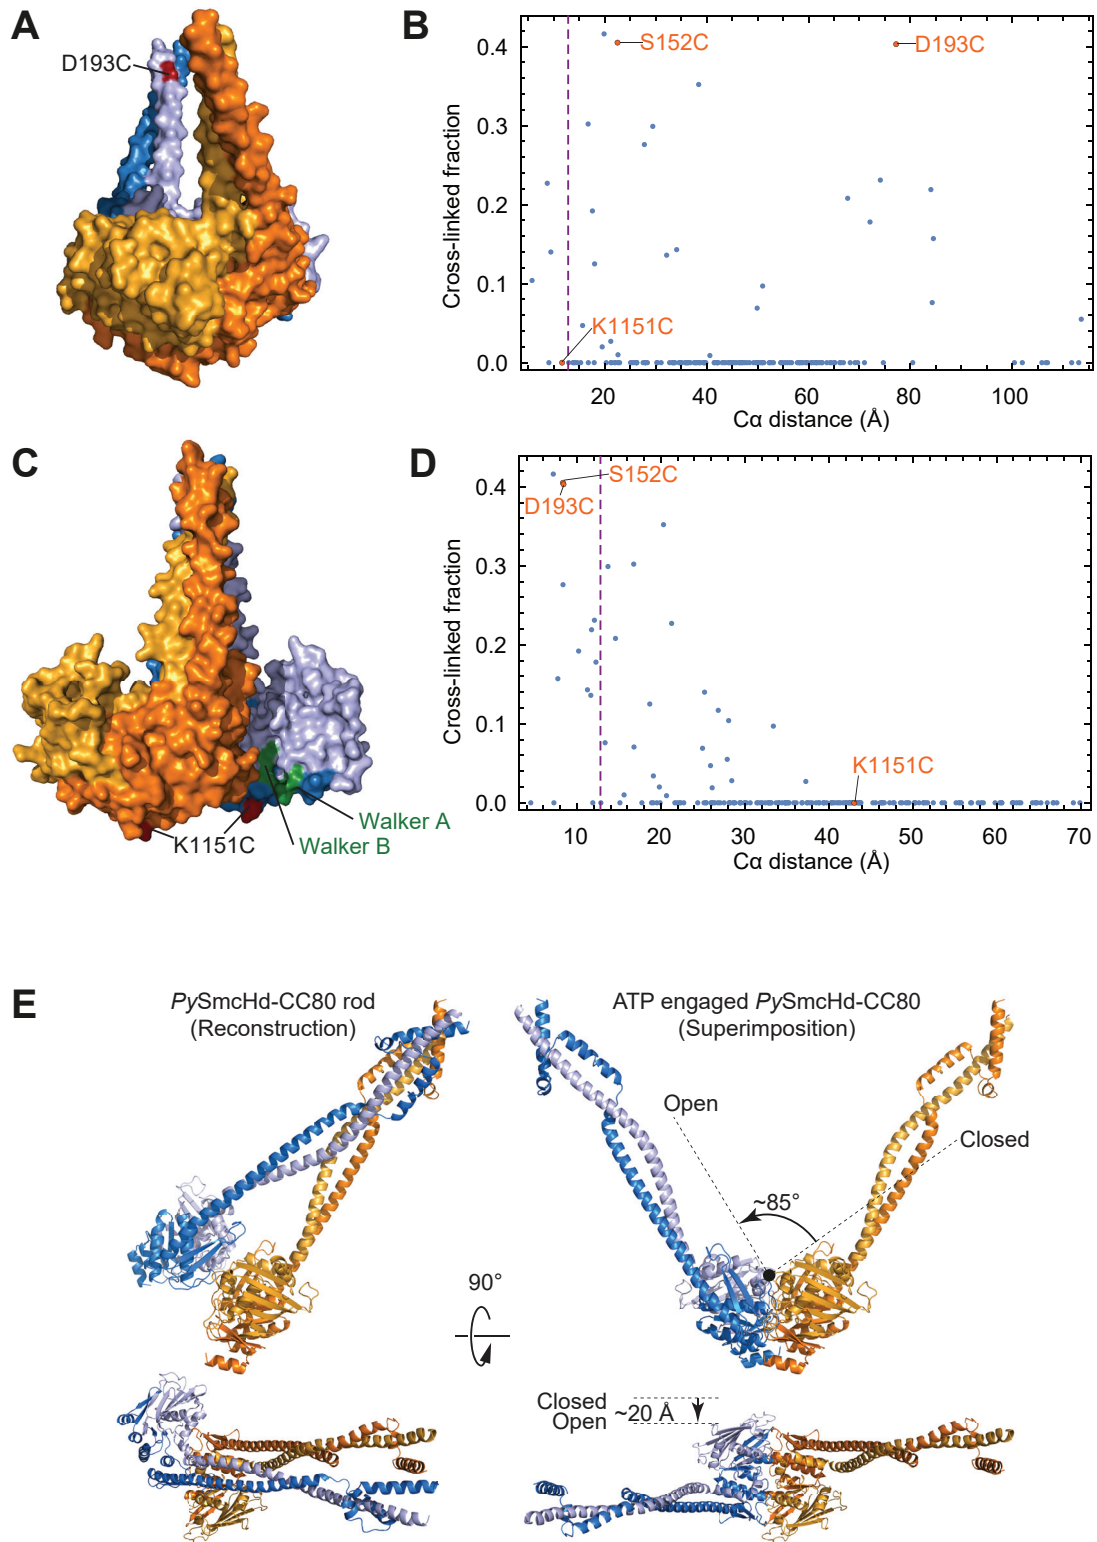

Figure S5

**Figure S5.** Structural comparison of rod-aligned and ATP-engaged Smc heads. Related to Figure 5.

(A-D) Characterization of engaged (A, B) and juxtaposed (C, D) Smc heads. Side views of models shown in Figure 5B and 5C (A, C, respectively). Plotting C $\alpha$ -C $\alpha$  distance distribution against cross-linking efficiencies shown in Figure 2A (B, D).

(E) Comparison of rod-aligned (left panels; taken from Figure 4B) and ATP-engaged *PySmcHd-CC80* (right panels; superimposed onto PDB: 1XEX) in side (top panels) and top views (bottom panels). The position and orientation of the monomer in orange colors is identical in the two top and the two bottom panels. The monomer in blue colors tilts by about 85° relative to the other monomer (top panel) and translates by about 20 Å.

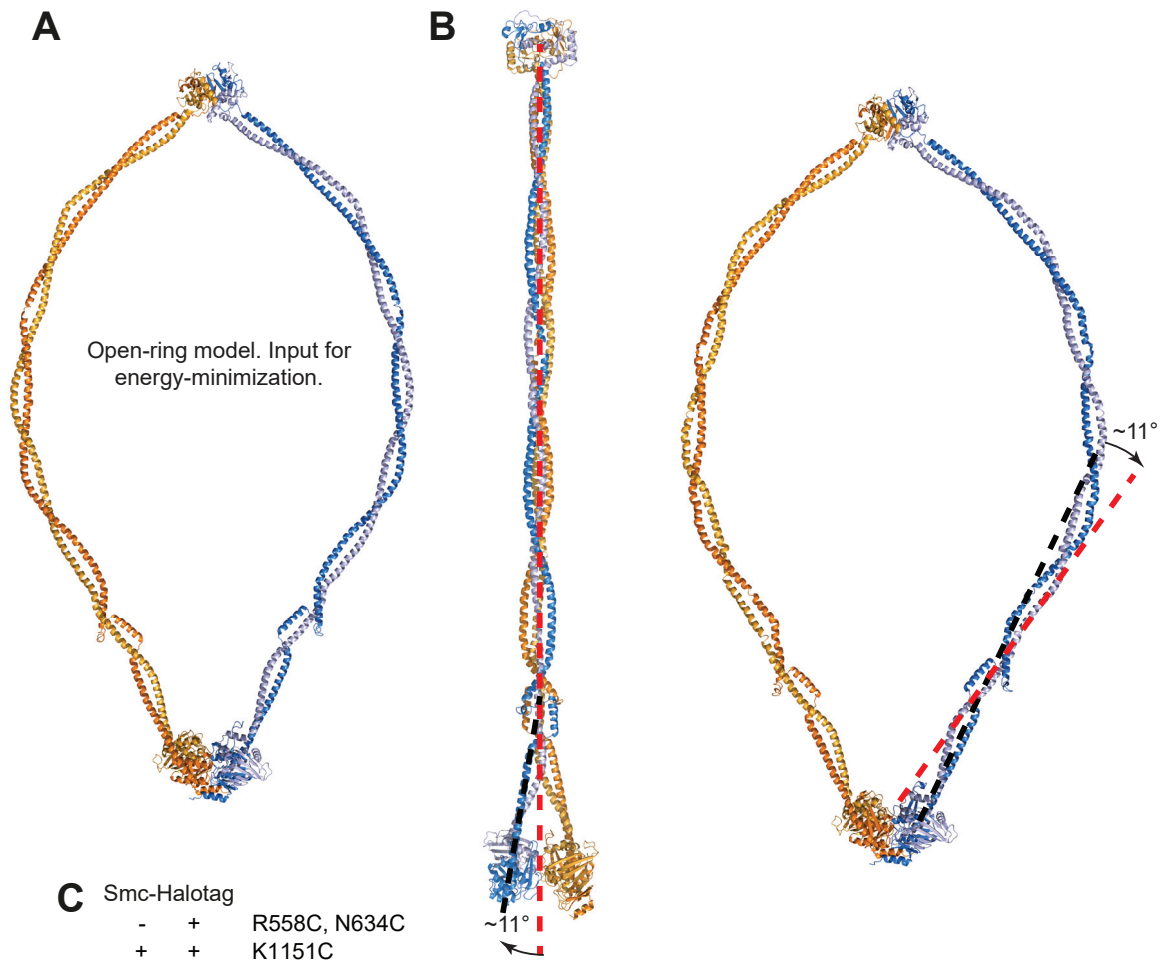

**C** Smc-HaloTag

|   |   |              |
|---|---|--------------|
| - | + | R558C, N634C |
| + | + | K1151C       |

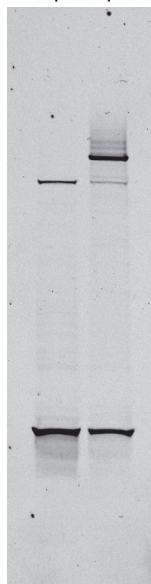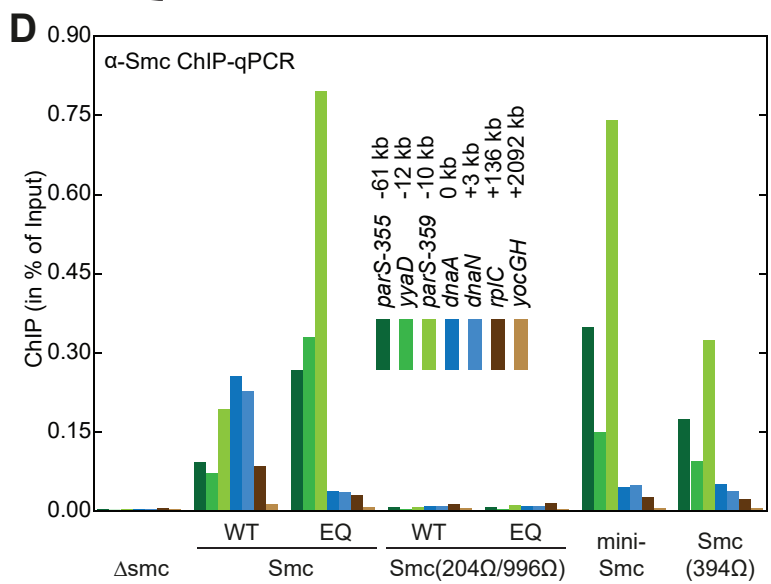

Figure S6

**Figure S6.** Model of an open Smc dimer. Related to Figure 6.

(A) Input model for energy-minimization constructed by bending of the coiled coil from the Smc hinge to the Smc joint.

(B) The Smc joint – as observed in the model of the Smc rod (left panel) – bends the coiled coil away from the symmetry axis possibly to support wide opening of the Smc ring upon head engagement (right panel – energy minimized model).

(C) Simultaneous engagement of the Smc hinge and ATP dimer Smc heads. Similar to the experiment shown in Figure 6B using Smc proteins with wild-type ATPase domain. Please note that the contrast is enhanced to display low-abundance species.

(D) Chromosome localization of Smc proteins with modified coiled coils. Similar to the experiment shown in Figure 6F using Smc proteins lacking a HaloTag and cysteine modifications.

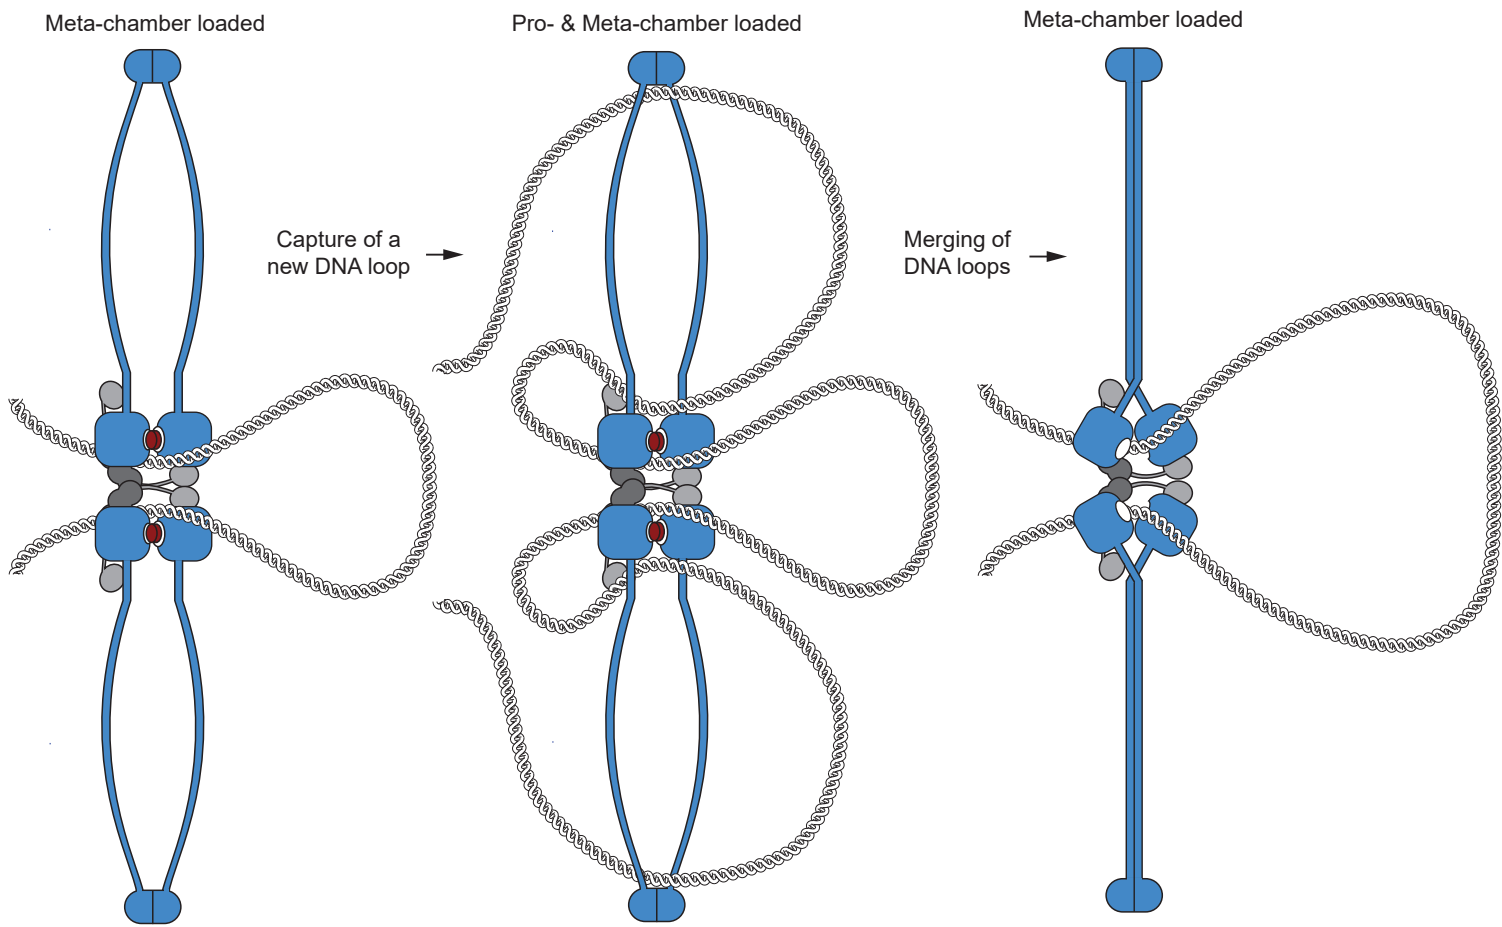

Figure S7

**Figure S7.** A tentative SMC handcuff model. Related to Figure 7.

As in Figure 7, involving a putative 'handcuff' Smc-ScpAB dimer. The two Smc-ScpAB complexes translocate in opposite orientation on the DNA, each being topologically loaded onto a single DNA double helix.



**Table S1, related to Figure 2 and 3.** Data collection and structure refinement statistics.

| <b>Data Collection</b>                                  | <b>BsSmcCC2<br/>SeMet</b>       | <b>BsSmcCC1<br/>SeMet</b>        | <b>BsSmcCC1<br/>native</b>       |
|---------------------------------------------------------|---------------------------------|----------------------------------|----------------------------------|
| X-ray source                                            | SLS PXII<br>XD10SA <sup>a</sup> | DESY BL P11 <sup>b</sup>         | DESY BL P11 <sup>b</sup>         |
| Space group                                             | P1                              | P2 <sub>1</sub> 2 <sub>1</sub> 2 | P2 <sub>1</sub> 2 <sub>1</sub> 2 |
| a, b, c (Å)                                             | 44.30, 42.73,<br>174.60         | 64.88, 77.32,<br>83.98           | 64.83, 78.03,<br>83.86           |
| α, β, γ (°)                                             | 89.97, 93.64,<br>89.97          | 90, 90, 90                       | 90, 90, 90                       |
| Wavelength (Å)                                          | 0.9792                          | 0.9793                           | 0.9806                           |
| Resolution (Å)                                          | 87.12 - 2.892                   | 50.0-2.38                        | 50.0-1.8                         |
| <i>R</i> <sub>sym</sub> (%) <sup>d</sup>                | 8.3 (61)                        | 5.8 (84.4)                       | 4.0 (76.0)                       |
| <i>I</i> /σ( <i>I</i> )                                 | 12.33 (2.58)                    | 20.45 (2.03)                     | 16.95 (1.75)                     |
| Completeness (%)                                        | 98.54 (96.20)                   | 99.8 (99)                        | 99.7 (99.2)                      |
| Redundancy                                              | 3.6 (3.6)                       | 6.9 (6.9)                        | 4.3 (4.2)                        |
| <b>Refinement</b>                                       |                                 |                                  |                                  |
| Resolution (Å)                                          | 50.00 - 3.295                   |                                  | 50.00 - 1.898                    |
| No. of reflections                                      | 37323                           |                                  | 65454                            |
| <i>R</i> <sub>work</sub> / <i>R</i> <sub>free</sub> (%) | 27.27 / 29.73                   |                                  | 18.27 / 21.35                    |
| bond lengths (Å) /<br>angles (°)                        | 0.003 / 0.84                    |                                  | 0.011 / 1.035                    |
| Average B-values (Å <sup>2</sup> )                      | 109.6                           |                                  |                                  |
| Favored                                                 | 98.29                           |                                  | 98.63                            |
| allowed                                                 | 1.49                            |                                  | 1.03                             |
| Disallowed                                              | 0.21                            |                                  | 0.34                             |

<sup>a</sup>Villigen, Switzerland, <sup>b</sup>Hamburg Germany

<sup>d</sup>The numbers in parentheses are the statistics from the highest resolution shell.

**Table S1, related to Figure 3, 4 and 5. Continued.**

| Data Collection                                         | <b>PySmcHd-<br/>CC80</b> | <b>BsSmcHd-CC30:<br/>ATP<sub>γ</sub>S–ScpA<sup>c</sup></b> | <b>PySmcCC3</b>        |
|---------------------------------------------------------|--------------------------|------------------------------------------------------------|------------------------|
| X-ray source                                            | BL5C, PAL <sup>a</sup>   | BL5A, PF <sup>b</sup>                                      | BL5C, PAL <sup>a</sup> |
| Space group                                             | C2                       | P2 <sub>1</sub> 2 <sub>1</sub> 2 <sub>1</sub>              | P2 <sub>1</sub>        |
| a, b, c (Å)                                             | 120.32, 50.84,<br>122.06 | 88.10, 104.78,<br>185.22                                   | 36.18, 53.71,<br>71.40 |
| α, β, γ (°)                                             | 90, 118.09, 90           | 90, 90, 90                                                 | 90, 90.83, 90          |
| Wavelength (Å)                                          | 0.97941                  | 1.0000                                                     | 0.97941                |
| Resolution (Å)                                          | 50.0-2.6                 | 50.0-3.5                                                   | 50.0-2.0               |
| <i>R</i> <sub>sym</sub> (%) <sup>d</sup>                | 7.9 (32.4)               | 5.6 (27.9)                                                 | 5.4 (23.5)             |
| <i>I</i> / <i>σ</i> ( <i>I</i> )                        | 13.7 (2.6)               | 12.3 (3.7)                                                 | 23.8 (2.1)             |
| Completeness (%)                                        | 92.8 (69.1)              | 92.6 (86.5)                                                | 94.4 (78.5)            |
| Redundancy                                              | 4.2 (2.0)                | 5.4 (1.8)                                                  | 4.3 (2.5)              |
| <b>Refinement</b>                                       |                          |                                                            |                        |
| Resolution (Å)                                          | 50.0-2.6                 | 50.0-3.5                                                   | 50.0-2.0               |
| No. of reflections                                      | 18871                    | 35074                                                      | 17586                  |
| <i>R</i> <sub>work</sub> / <i>R</i> <sub>free</sub> (%) | 23.1 / 28.6              | 25.2 / 30.1                                                | 22.8 / 24.7            |
| bond lengths (Å) /<br>angles (°)                        | 0.006 / 0.878            | 0.009 / 1.256                                              | 0.006 / 0.975          |
| Average B-values<br>(Å <sup>2</sup> )                   | 69.6                     | 57.51                                                      | 49.6                   |
| Most favored/Favored                                    | 89.6 / 9.0               | 87.6 / 10.6                                                | 97.7 / 2.3             |
| Generously allowed                                      | 1.1                      | 1.3                                                        | 0.0                    |
| Disallowed                                              | 0.4                      | 0.4                                                        | 0.0                    |

<sup>a</sup>Pohang Accelerator Laboratory, <sup>b</sup>Photon Factory<sup>d</sup>The numbers in parentheses are the statistics from the highest resolution shell.

**Table S2, related to Figures 2, 5 and 6. Strain usage.**

| <b>Figure</b> | <b>Strains</b>                                                                                                                                                                                                |
|---------------|---------------------------------------------------------------------------------------------------------------------------------------------------------------------------------------------------------------|
| 5D            | BSG2264, BSG2300, BSG1457, BSG2588, BSG2608, BSG1607,<br>BSG2589, BSG2606, BSG1600, BSG2265, BSG2313, BSG1488,<br>BSG2314, BSG2315, BSG1598                                                                   |
| 6B            | BSG1488, BSG1640, BSG1666                                                                                                                                                                                     |
| 6C            | BSG1457, BSG1007, BSG2694                                                                                                                                                                                     |
| 6D            | BSG1457, BSG1488, BSG2694, BSG2693, BSG2408, BSG2135                                                                                                                                                          |
| 6E            | BSG1921, BSG1457, BSG1922, BSG1488, BSG2680, BSG2694,<br>BSG2692, BSG2693                                                                                                                                     |
| 6F            | BSG1007, BSG1457, BSG1488, BSG2694, BSG2693, BSG2408,<br>BSG2135                                                                                                                                              |
| S2C           | BSG2326, BSG2324, BSG2382, BSG2381, BSG2270, BSG2322,<br>BSG2063, BSG2320, BSG2413, BSG2299, BSG2379, BSG2378,<br>BSG2267, BSG2377, BSG2376, BSG2375, BSG2300, BSG2264,<br>BSG1921, BSG2383, BSG2385, BSG2386 |
| S2D           | BSG1360, BSG1007, BSG1008, BSG1921, BSG2299, BSG2379,<br>BSG2378, BSG2267, BSG2377, BSG2376, BSG2375, BSG2300,<br>BSG2264, BSG2383, BSG2385, BSG2386                                                          |
| S6C           | BSG1638, BSG2638                                                                                                                                                                                              |
| S6D           | BSG1007, BSG1002, BSG1008, BSG2648, BSG2688, BSG2091, BSG2018                                                                                                                                                 |

**Table S3, related to STAR methods.** Primers used for qPCR

| <b>Locus</b>    | <b>Primer 1</b>       | <b>Primer 2</b>      |
|-----------------|-----------------------|----------------------|
| <i>parS-355</i> | taattcatcatcgcgctcaa  | aatgccgattacgagtttg  |
| <i>yyaD</i>     | cttgcgattttgcttctcc   | acatcaccatacgtggacga |
| <i>parS-359</i> | aaaaagtgattgcggagcag  | agaaccgcatctttcacagg |
| <i>dnaA</i>     | gatcaatcggggaaagtgtg  | gtagggcctgtggatttg   |
| <i>dnaN</i>     | gaattccttcaggccattga  | gatttctggcgaattggaag |
| <i>rplC</i>     | ttgacgacaagcgtgaaaag  | ttcatacgcatccattcca  |
| <i>yocGH</i>    | tccatatacctcgctcctacg | attctgctgatgtgcaatgg |
